# Supplementary material for: Hierarchical flower-like Bi2WO6 hollow microspheres: facile synthesis and excellent catalytic performance
Source: Royal Society of Chemistry journal article supplement (doi:10.1039/c4ra14782k), 2015-01-01
Supplement: c4ra14782k1.pdf [file c4ra14782k1.pdf]

## Supporting Information

# Hierarchical flower-like $\text{Bi}_2\text{WO}_6$ hollow microspheres: facile synthesis and excellent catalytic performance

Peigen Zhang<sup>a, b</sup>, Jian Zhang<sup>a</sup>, Hai Yang<sup>a, b</sup>, Anjian Xie<sup>a, b</sup>, Shikuo Li<sup>a, b</sup>, Jiming Song<sup>a</sup>, Yuhua Shen<sup>a, b, \*</sup>

<sup>a</sup> School of Chemistry and Chemical Engineering, Anhui University, Hefei 230601, P. R. China. E-mail: yhshen@ahu.edu.cn; Tel: +860551 63861475

<sup>b</sup> Lab for Clean Energy & Green Catalysis, Anhui University, Hefei 230601, P. R. China

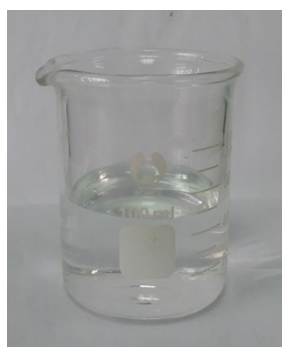

Fig. S1 Digital photo after  $\text{Na}_2\text{WO}_4 \cdot 2\text{H}_2\text{O}$  solution added dropwise into  $\text{Bi}(\text{NO}_3)_3 \cdot 5\text{H}_2\text{O}$  solution, stirring for 30 min.

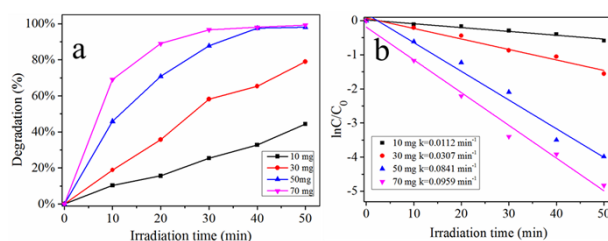

Fig. S2 Degradation rate of RhB ( $1.0 \times 10^{-5} \text{ mol L}^{-1}$ , 50 mL) varied with the dose of hierarchical flower-like hollow  $\text{Bi}_2\text{WO}_6$  under visible-light irradiation for 50 min: (a) time-dependent, (b) First-order plots
